# Supplementary material for: Multifunctional sulfur-mediated strategy enabling fast-charging Sb2S3micro-package anode for lithium-ion storage
Source: Royal Society of Chemistry journal article supplement (doi:10.1039/d0ta11954g), 2021-01-01
Supplement: d0ta11954g1.pdf [file d0ta11954g1.pdf]

**Supporting Information for**

**Multifunctional Sulfur-Mediated Strategy Enabling Fast-Charging  $\text{Sb}_2\text{S}_3$  Micro-Package Anode for Lithium-Ion Storage**

Shaohua Wang<sup>a,b</sup>, Yong Cheng<sup>a,\*</sup>, Hongjin Xue<sup>a,b</sup>, Wanqiang Liu<sup>d</sup>, Zheng Yi<sup>a,\*\*</sup>, Limin Chang<sup>c,\*\*\*</sup>, Limin Wang<sup>a,b</sup>

<sup>a</sup>State Key Laboratory of Rare Earth Resource Utilization, Changchun Institute of Applied Chemistry, CAS, Changchun, 130022, China.

<sup>b</sup>School of Applied Chemistry and Engineering, University of Science and Technology of China, Hefei, 230026, China.

<sup>c</sup>Key Laboratory of Preparation and Applications of Environmental Friendly Materials (Jilin Normal University), Ministry of Education, Changchun, 130103, China.

<sup>d</sup>School of Materials Science and Engineering, Changchun University of Science and Technology, Changchun, 130022, China.

E-mail: [cyong@ciac.ac.cn](mailto:cyong@ciac.ac.cn); [yizheng@ciac.ac.cn](mailto:yizheng@ciac.ac.cn); [lmchang@jlnu.edu.cn](mailto:lmchang@jlnu.edu.cn)

## Experimental Section

**Chemicals.** All the reagents are of analytical grade and used without further purification. Analytically pure antimony trioxide ( $\text{Sb}_2\text{O}_3$ , Aladdin, China), sulfur (S, Tianjin Guangfu Reagent Company, China), expandable graphite (Nanjing Xianfeng, China). The  $\text{LiNi}_{1/3}\text{Co}_{1/3}\text{Mn}_{1/3}\text{O}_2$  (NCM 333) was purchased from Beijing Dangsheng Material Technology Co., Ltd.

**Preparation of EG.** The expandable graphite was annealed at  $1000^\circ\text{C}$  for 1 min under argon atmosphere with the heating rate of  $5^\circ\text{C}/\text{min}$  to obtain EG.

### **Preparation of $\text{Sb}_2\text{S}_3@\text{EG}'\text{-S}$ , $\text{Sb}_2\text{S}_3/\text{EG}-\text{S}$ , EG-S-30, EG-30 composite material.**

$\text{Sb}_2\text{O}_3$ , EG, and S are mixed with ball-milling in the weight ratio of 3:1:5. Planetary ball mill was used with a ball-to-material ratio of 50:1, a speed of 400 r/min, and ball-milling time of 30h. The final material was collected and annealed at  $500^\circ\text{C}$  for 2 hours in a tube furnace under argon atmosphere with the heating rate of  $2^\circ\text{C}/\text{min}$ . Then, the  $\text{Sb}_2\text{S}_3@\text{EG}'\text{-S}$  composite material was obtained. As comparison,  $\text{Sb}_2\text{S}_3/\text{EG}-\text{S}$  composite material was prepared by just introducing the sulfur in the annealing process. The preparation method of EG-S-30 and EG-30 is the same as  $\text{Sb}_2\text{S}_3@\text{EG}'\text{-S}$  and  $\text{Sb}_2\text{S}_3/\text{EG}-\text{S}$  except the  $\text{Sb}_2\text{O}_3$  is absence.

**Materials characterizations.** The crystalline phases of the as-prepared samples were investigated by X-ray diffraction (XRD) on a Bruker D8 Focus power X-ray diffractometer with  $\text{Cu K}\alpha$  radiation ( $\lambda=0.154056\text{ nm}$ ) at a scan rate of  $5^\circ\text{min}^{-1}$  in the  $2\theta$  range of  $10\sim 80^\circ$ . The morphologies and microstructures of the as-synthesized products were observed by a field-emission scanning electron microscope (FE-SEM,

Hitachi S-4800) with an acceleration voltage of 10 kV. Detailed microstructure analysis was conducted using a transmission electron microscopy (TEM, Tecnai G2) with a field emission gun operating voltage of 200 kV. Thermo-gravimetric (TG) analysis was carried out to estimate the carbon content on an STA 449 Jupiter (NETZSCH) thermogravimetry analyzer from room temperature to 800°C with a heating rate of 10°C min<sup>-1</sup>. X-ray photoelectron spectra (XPS) analysis was performed to evaluate the surface state and chemical composition on an ESCALABMKLL X-ray photoelectron spectrometer using an Al K $\alpha$  source. Nitrogen adsorption/desorption isotherms were acquired through a Micromeritics ASAP 2010 surface area and porosity analyzer at -196°C. The specific surface area was calculated by using the Brunauer-Emmett-Teller (BET) method. The pore size distribution profile was derived via a nonlocal density functional theory (DFT) method from the adsorption branch of the nitrogen adsorption/desorption isotherms.

**Electrochemical measurements.** Coin-type cells were assembled in an argon-filled glove box to investigate the lithium storage performances of the as-prepared samples. For the preparation of the working electrode, a homogenous slurry was acquired by mixing the as-prepared samples, acetylene black and carboxymethyl cellulose (CMC) with a mass weight ratio of 80:10:10 dissolving in appropriate deionized water. The resultant slurry was then coated onto a copper foil and dried in a vacuum oven at 60 °C overnight. The average mass loading was 1.0~1.3 mg cm<sup>-2</sup>. The half cells were constructed by using the lithium foil as the counter/reference electrode, Celgard 2400 membrane as the separator, and 1 M LiPF<sub>6</sub> dissolved in ethylene carbonate (EC) and

diethyl carbonate (DEC) (1/2, v/v) with 10 % (v) addition of fluoroethylene carbonate (FEC) as the electrolyte. For Li-ion full cells, commercial  $\text{LiNi}_{1/3}\text{Co}_{1/3}\text{Mn}_{1/3}\text{O}_2$  (NCM 333) (91 wt.%), C45 (2 wt.%), KS-6 (2 wt.%) and polyvinylidene fluoride (PVDF, 5 wt.%) were mixed in N-methyl-2-pyrrolidone (NMP) and then pasted onto a piece of Al foil to form the cathode electrode. In addition, the NCM 333 mass loading of the cathode was appropriately chosen to balance the capacity of the anode. The specific capacity of the full cell is calculated according to the mass of the cathode electrode. The anode was electrochemically pre-lithiated for five cycles in order to eliminate the irreversible capacity in the first cycle before being used. The galvanostatic charge/discharge performance was tested on a programmable battery testing instrument (LAND CT2001A) at room temperature. Cyclic voltammogram (CV) and electrochemical impedance spectroscopy (EIS) measurements were carried out on a Bio-Logic VMP3 Electrochemical Workstation.

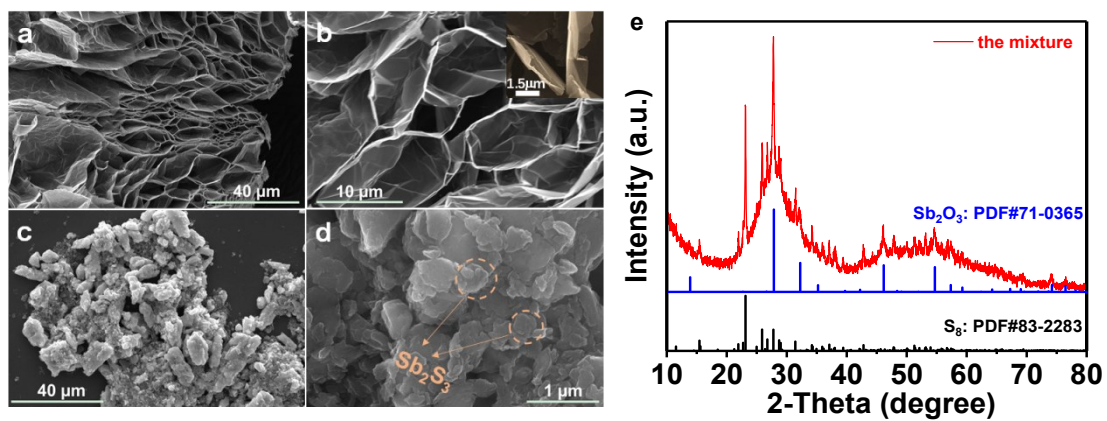

**Figure S1.** SEM images of (a, b) EG and (c, d) Sb<sub>2</sub>S<sub>3</sub>/EG-S. (e) XRD pattern for the mixture before annealed.

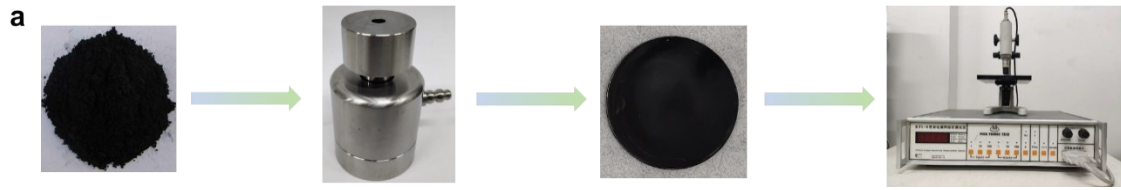

**b**

|                      | <b>EG-S-30</b>                 | <b>EG-30</b>                    |
|----------------------|--------------------------------|---------------------------------|
| <b>1 st</b>          | <b>19.23 S cm<sup>-1</sup></b> | <b>0.055 S cm<sup>-1</sup></b>  |
| <b>2 nd</b>          | <b>19.23 S cm<sup>-1</sup></b> | <b>0.054 S cm<sup>-1</sup></b>  |
| <b>3 rd</b>          | <b>19.05 S cm<sup>-1</sup></b> | <b>0.052 S cm<sup>-1</sup></b>  |
| <b>Average value</b> | <b>19.17 S cm<sup>-1</sup></b> | <b>0.0536 S cm<sup>-1</sup></b> |

**Figure S2.** (a) Schematic diagram of four-probe method to measure the conductivity of EG-S-30 and EG-30 material. (b) The conductivity of two samples.

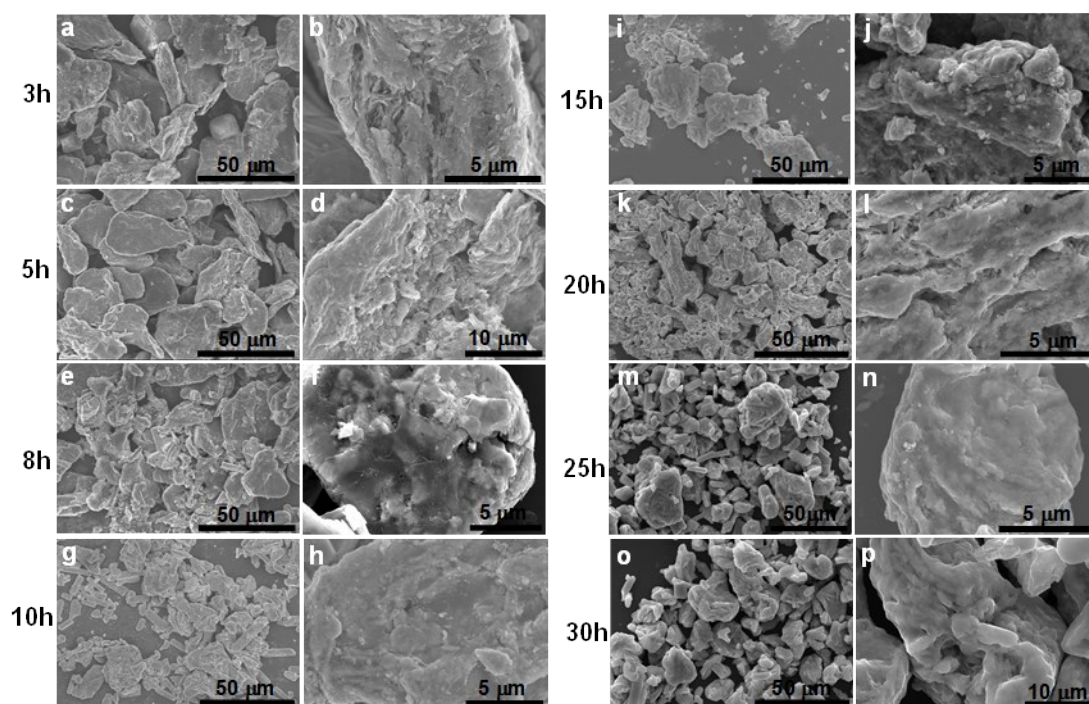

**Figure S3.** SEM images of  $\text{Sb}_2\text{S}_3@\text{EG}'\text{-S}$  material at different balling time.

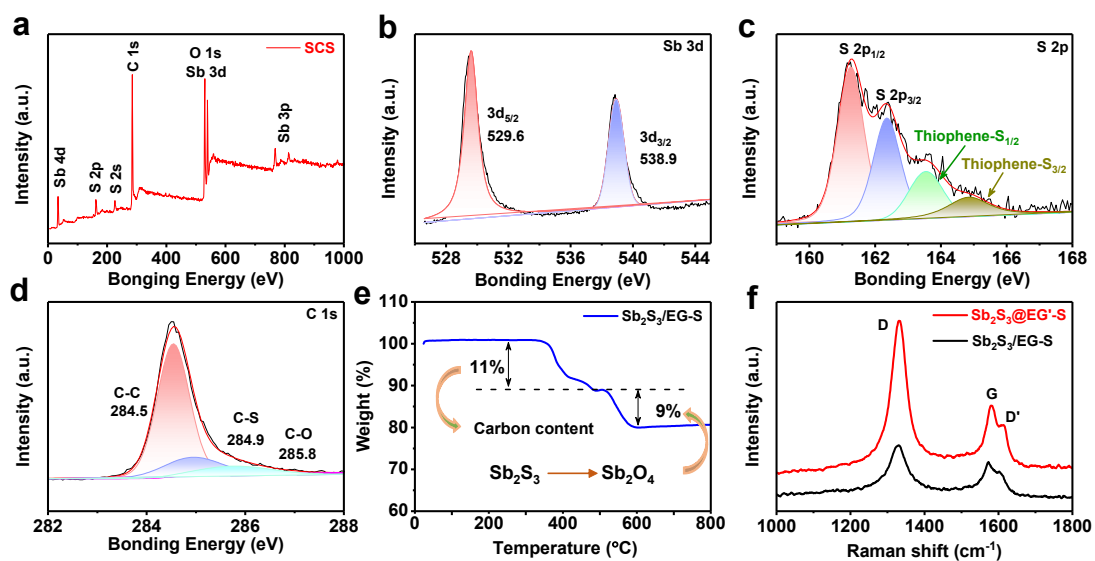

**Figure S4.** X-ray photoelectron spectroscopy (XPS): (a) survey, (b) Sb 3d, (c) S 2s, (d) C 1s of  $\text{Sb}_2\text{S}_3/\text{EG-S}$ . (e) TG curve. (f) Raman spectra of  $\text{Sb}_2\text{S}_3@\text{EG}'\text{-S}$  and  $\text{Sb}_2\text{S}_3/\text{EG-S}$



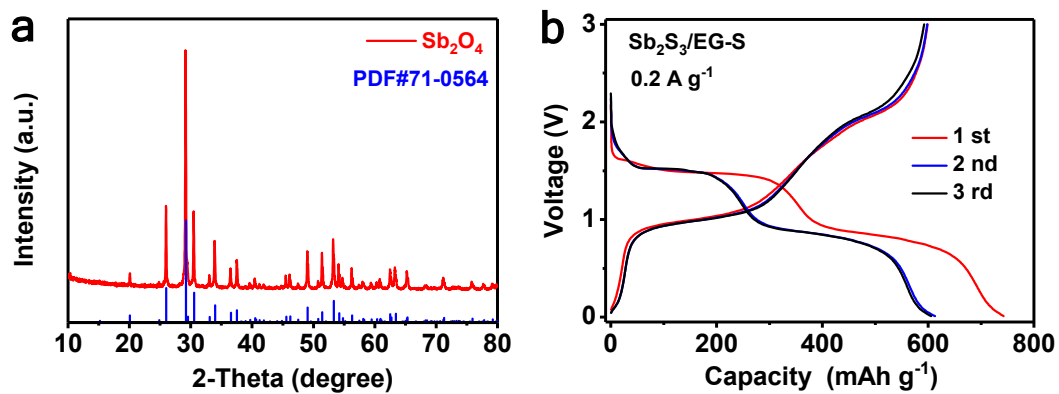

**Figure S5.** (a) XRD pattern of the samples after completed annealed. (b) Charge/discharge curves of Sb<sub>2</sub>S<sub>3</sub>/EG-S anode at the current density of 0.2 A g<sup>-1</sup>.

**Table S1.** The peak potential and displacement of  $\text{Sb}_2\text{S}_3@\text{EG}'\text{-S}$  anode and  $\text{Sb}_2\text{S}_3/\text{EG-S}$  anode in  $dQ/dV$  curves at the current density of 5 C.

|                            | 0.01-1.5 V                                  |                                     | 1.5-3 V                                     |                                     |
|----------------------------|---------------------------------------------|-------------------------------------|---------------------------------------------|-------------------------------------|
|                            | $\text{Sb}_2\text{S}_3@\text{EG}'\text{-S}$ | $\text{Sb}_2\text{S}_3/\text{EG-S}$ | $\text{Sb}_2\text{S}_3@\text{EG}'\text{-S}$ | $\text{Sb}_2\text{S}_3/\text{EG-S}$ |
| 1 st-0.2C                  | 0.98 V                                      | 0.982 V                             | 2.082 V                                     | 2.060 V                             |
| 10 th-5C                   | 1.0 V                                       | 1.124 V                             | 2.106 V                                     | 2.248 V                             |
| 50 th-5C                   | 1.018 V                                     | 1.124 V                             | 2.123 V                                     | 2.234 V                             |
| 100 th-5C                  | 1.043 V                                     | 1.159 V                             | 2.084 V                                     | 2.277 V                             |
| 120 th-5C                  | 1.045 V                                     | 1.223 V                             | 2.08 V                                      | 2.299 V                             |
| $\Delta V(V_{120}-V_{10})$ | -0.045 V                                    | 0.099 V                             | -0.026 V                                    | 0.051 V                             |

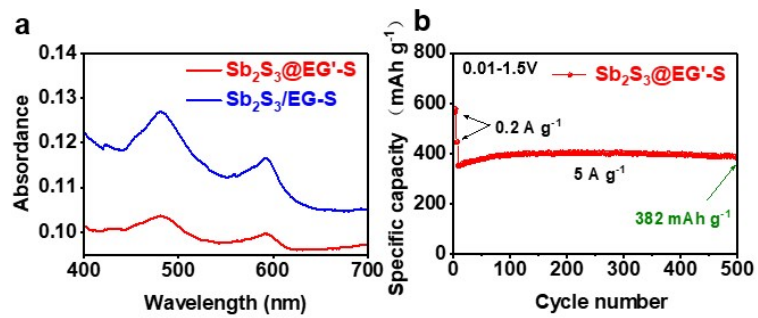

**Figure S6.** (a) ultraviolet absorption spectrum of  $\text{Sb}_2\text{S}_3@\text{EG}'\text{-S}$  anode and  $\text{Sb}_2\text{S}_3/\text{EG-S}$  anode. (b) Cycle performance of  $\text{Sb}_2\text{S}_3@\text{EG}'\text{-S}$  anode at the current density of 5  $\text{A g}^{-1}$  (The voltage range is 0.01 to 1.5V).

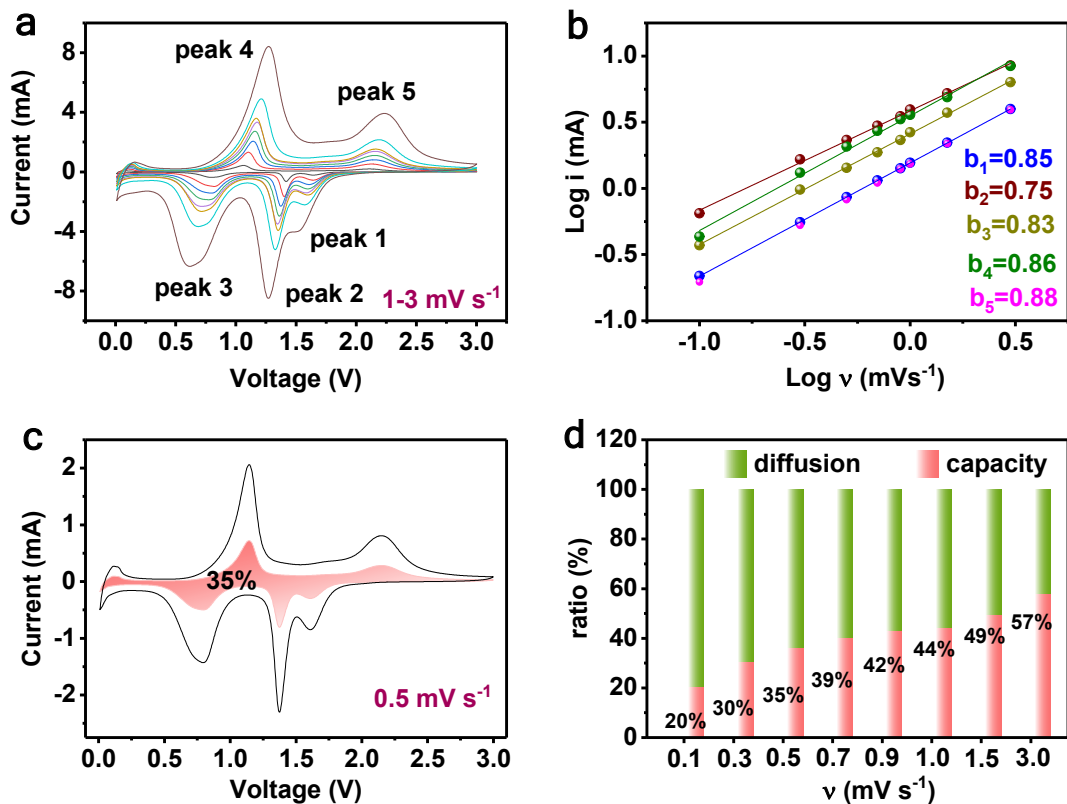

**Figure S7.** (a) CV curves of the  $\text{Sb}_2\text{S}_3@\text{EG}'\text{-S}$  electrode at different scan rates. (b) Relationship between the logarithm cathodic peak current and logarithm scan rates. (c) Capacitive contribution (pink) and diffusion contribution at the scan rate of  $0.5 \text{ mV s}^{-1}$ . (d) Normalized contribution ratio of capacitive capacities at different scan rates.

**Table S2.** Comparison of the electrochemical performance of as-prepared  $\text{Sb}_2\text{S}_3@\text{EG}'\text{-S}$  and those  $\text{Sb}_2\text{S}_3$ -based anodes reported before.

| Materials                                                                        | Method                                        | Current Density (mAh g <sup>-1</sup> ) | Specific Capacity (mAh g <sup>-1</sup> ) | Cycle number | Ref. | Year |
|----------------------------------------------------------------------------------|-----------------------------------------------|----------------------------------------|------------------------------------------|--------------|------|------|
| <b>This work</b><br>(micro-package $\text{Sb}_2\text{S}_3@\text{EG}'\text{-S}$ ) | ball-milling                                  | 1000                                   | 645.5                                    | 120          |      | /    |
|                                                                                  |                                               | 5000                                   | 548                                      | 100          |      |      |
|                                                                                  |                                               | 15000                                  | 444                                      | /            |      |      |
| Sb hollow sphere                                                                 | galvanic replacement                          | 1600                                   | 435.6                                    | /            | [34] | 2014 |
| $\text{Sb}_2\text{S}_3/\text{Sb}$                                                | solvothermal method                           | 1000                                   | 387                                      | 200          | [35] | 2016 |
| bundle-like $\text{Sb}_2\text{S}_3$ micro-structure                              | oxidation–sulfuration route                   | 1000                                   | 300.5                                    | /            | [9]  | 2016 |
| $\text{Sb}_2\text{S}_3/\text{lotus-pollen}$ composites                           | hydrothermal method                           | 1000                                   | 436                                      | /            | [7]  | 2017 |
|                                                                                  |                                               | 2000                                   | 365                                      | /            |      |      |
| $\text{Sb}_2\text{S}_3$ nanorods wrapped in graphene sheets                      | hydrothermal strategy                         | 200                                    | 610                                      | 50           | [36] | 2018 |
| $\text{Sb}_2\text{S}_3@\text{C}$ nanospheres                                     | hydrothermal method                           | 100                                    | 745.3                                    | 160          | [37] | 2018 |
| $\text{Sb}_2\text{S}_3/\text{MMCN}@ppy$ composite                                | solvothermal, sulfidation and polymerization  | 2000                                   | 526                                      | /            | [38] | 2019 |
| $\text{Sb}_2\text{S}_3/\text{CNT}$ composite                                     | ethylene glycol-mediated solvothermal process | 200                                    | 443                                      | 100          | [39] | 2019 |
| octahedral $\text{Sb}_2\text{O}_3$                                               | method of precipitation                       | 200                                    | 640.8                                    | 50           | [40] | 2019 |
| CPC/ $\text{Sb}_2\text{S}_3$ composite                                           | hydrothermal method                           | 6000                                   | 369                                      | /            | [41] | 2019 |
| $\text{MoS}_2\text{-Sb}@Sb_2S_3@\text{C}$ nano-tubular                           | in-situ thermal carbonization                 | 10000                                  | 302.2                                    | /            | [5]  | 2019 |
| S-rGO/ $\text{Sb}_2\text{S}_3$ composite                                         | solvothermal treatment                        | 5000                                   | 249                                      | /            | [42] | 2020 |
|                                                                                  |                                               | 1000                                   | 443                                      | /            |      |      |

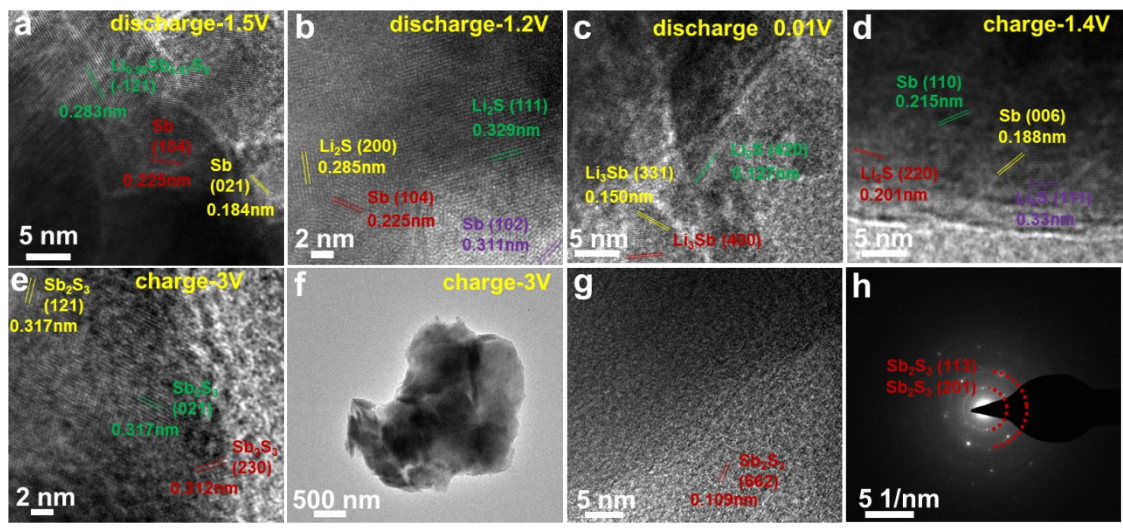

**Figure S8.** (a-e) HRTEM of  $\text{Sb}_2\text{S}_3@\text{EG}'\text{-S}$  at different voltage. (f) TEM, (g) HRTEM, (h) SAED of  $\text{Sb}_2\text{S}_3/\text{EG}-\text{S}$  at 3V for the first cycle.

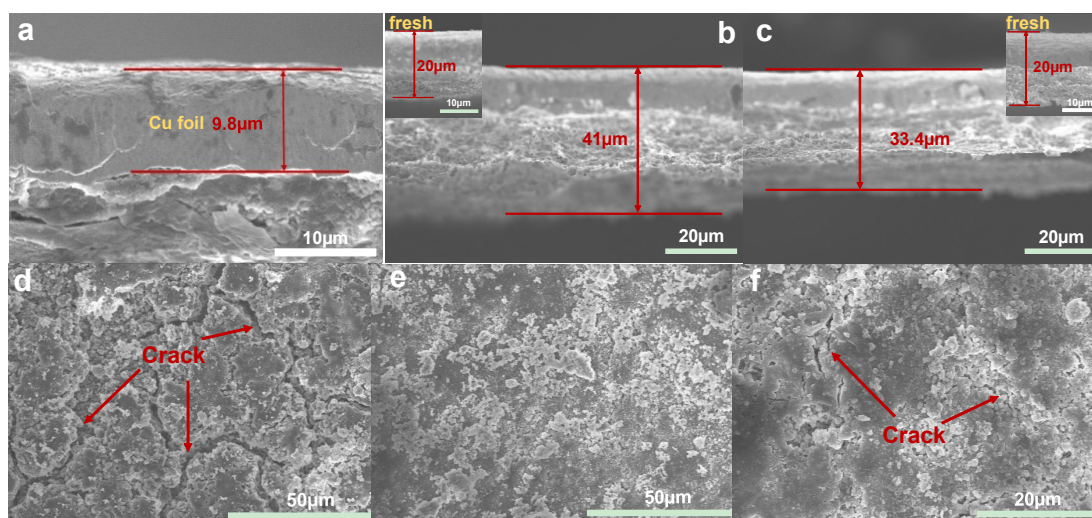

**Figure S9.** SEM images of two anodes. (a) copper foil, (b) Sb<sub>2</sub>S<sub>3</sub>/EG-S anode after 200 cycles and (c) Sb<sub>2</sub>S<sub>3</sub>@EG'-S after 200 cycles. Insert graphics in (b) and (c) are fresh electrodes. SEM of (d) Sb<sub>2</sub>S<sub>3</sub>/EG-S anode and (e) Sb<sub>2</sub>S<sub>3</sub>@EG'-S anode after 200 cycles. (f) Partially enlarged of (e).

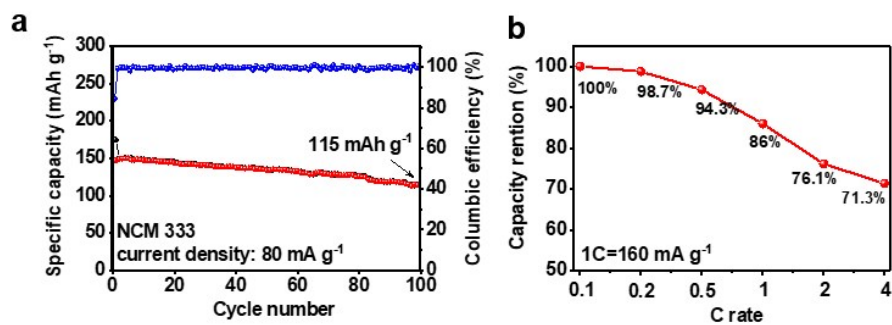

**Figure S10.** (a) Cycle performance of NCM333 at the current density of 80 mA g<sup>-1</sup>.  
 (b) Capacity retention of full battery at different rates.
